# Supplementary material for: Xanthomonas campestris cell–cell signalling molecule DSF (diffusible signal factor) elicits innate immunity in plants and is suppressed by the exopolysaccharide xanthan
Source: PubMed Central journal article supplement (PMC4623683; doi:10.1093/jxb/erv377), 2015-08-05
Supplement: supp_erv377_edited_supp_erv377___Copy.pdf [file supp_erv377_edited_supp_erv377___Copy.pdf]

1 **Supplementary data**

2

**Supplementary Tables**

**Table S1.** Infiltration of synthetic DSF into the leaves of rice and *Arabidopsis thaliana* induces callose deposition.

| DSF concentration <sup>a</sup> | Average number of callose deposits per 0.5 mm <sup>2</sup> area $\pm$ SD <sup>b</sup> |                             |
|--------------------------------|---------------------------------------------------------------------------------------|-----------------------------|
|                                | Rice                                                                                  | <i>Arabidopsis thaliana</i> |
| 0 $\mu$ M (Control)            | 6.8 $\pm$ 4.4                                                                         | 8.3 $\pm$ 5.0               |
| 50 $\mu$ M                     | 27.3 $\pm$ 10.1*                                                                      | 31.9 $\pm$ 8.1*             |
| 100 $\mu$ M                    | 42.7 $\pm$ 6.6*                                                                       | 60.7 $\pm$ 11.13*           |
| 200 $\mu$ M                    | 60.6 $\pm$ 10.3*                                                                      | 110.7 $\pm$ 25.8*           |

<sup>a</sup> DSF was infiltrated with 1ml needleless syringe on fully expanded leaves of either the adaxial surfaces of 15-day-old rice (susceptible cv. Taichung Native-1 [TN-1]) or 7-week old *Arabidopsis thaliana* ecotype Columbia (Col-0). For control treatment 1% methanol in water was used. <sup>b</sup>Callose deposition was visualized by staining with aniline blue and visualized by the stereo florescent microscope 18 h post infiltration. Results shown are the mean number of callose deposits per 0.5 mm<sup>2</sup> of leaf tissue and standard deviation from at least four leaves in each experiment (three experiments). For each leaf six microscopic fields were analyzed. \* indicate P

< 0.01 (T-test) significant difference between the data obtained for the DSF treatment compared to those obtained from the control (1% methanol in water).

**Table S2.** Specificity of DSF in inducing callose deposition in *N. benthamiana* leaves.

| Treatment <sup>a</sup>                 | Average number of callose deposits per 0.5 mm <sup>2</sup> area $\pm$ SD <sup>b</sup> |                 |
|----------------------------------------|---------------------------------------------------------------------------------------|-----------------|
|                                        | Experiment 1                                                                          | Experiment 2    |
| Control                                | 18.7 $\pm$ 9.6                                                                        | 15 $\pm$ 6.5    |
| DSF (100 $\mu$ M)                      | 94.4 $\pm$ 16.3*                                                                      | 115 $\pm$ 20.4* |
| Trans-11-methyl dodecenoic acid (1 mM) | 27.4 $\pm$ 19.04                                                                      | n. d            |
| decanoic acid (1 mM)                   | 22.0 $\pm$ 8.2                                                                        | n. d            |
| Lauric acid (1mM)                      | 32.3 $\pm$ 16.3                                                                       | n. d            |
| Palmitic acid (1 mM)                   | 23.2 $\pm$ 14.7                                                                       | n. d            |
| Myristoleic acid (1mM)                 | n. d                                                                                  | 38 $\pm$ 10.5   |
| Palmitoleic acid (1 mM)                | n. d                                                                                  | 30.4 $\pm$ 12.6 |

<sup>a</sup>*N. benthamiana* leaves were infiltrated with one of the following: control (1% methanol in water), DSF, *trans*-11-methyl dodecenoic acid, decanoic acid, lauric acid, palmitic acid, myristoleic acid and palmitoleic acid.

<sup>b</sup>Callose deposition was visualized by staining with aniline blue and visualized by the stereo fluorescence microscope 24 h post infiltration. Results shown are the mean number of callose deposits per 0.5 mm<sup>2</sup> of leaf tissue and standard deviation from at least three leaves in each experiment (three experiments). For each leaf six microscopic fields were analyzed. \* indicate P < 0.01 (T-test) significant difference between the data obtained for the DSF treatment compared to those obtained from the control and treatment with other fatty acid.

### Supplementary Figures

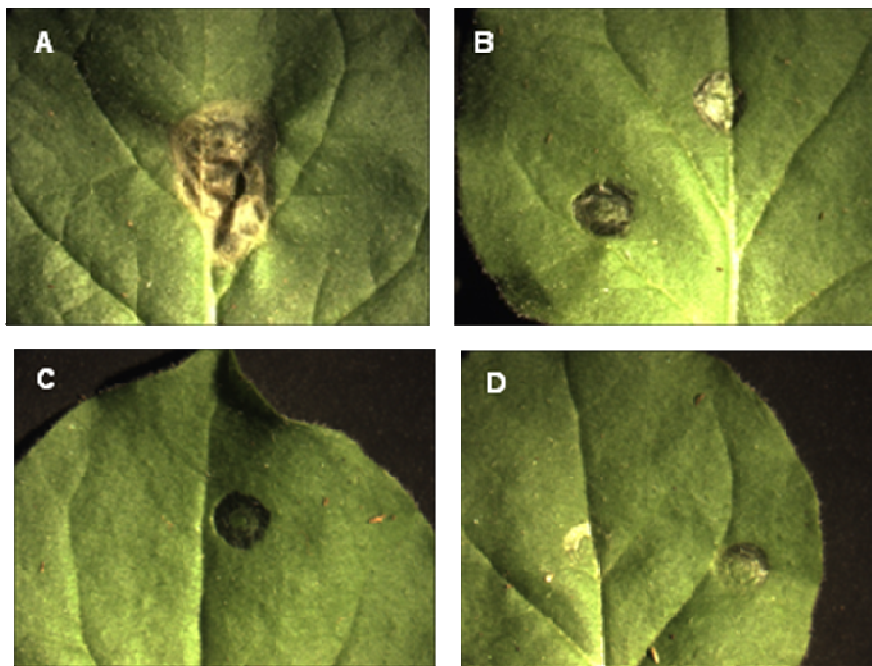

- 1 **Fig. S1.** Induction of hypersensitive (HR)-like response by DSF isolated from the cell free
- 2 culture supernatant of wild type *Xcc8004* strain by ethyl acetate extraction. (A to D) *N.*
- 3 *benthamiana* leaves after infiltration with DSF isolated from wild type *Xcc8004* strain (A); *Xcc*
- 4 *rpfF* (DSF) (B); control media extract (C); and coinfiltration of DSF with *Xcc8004* (D).

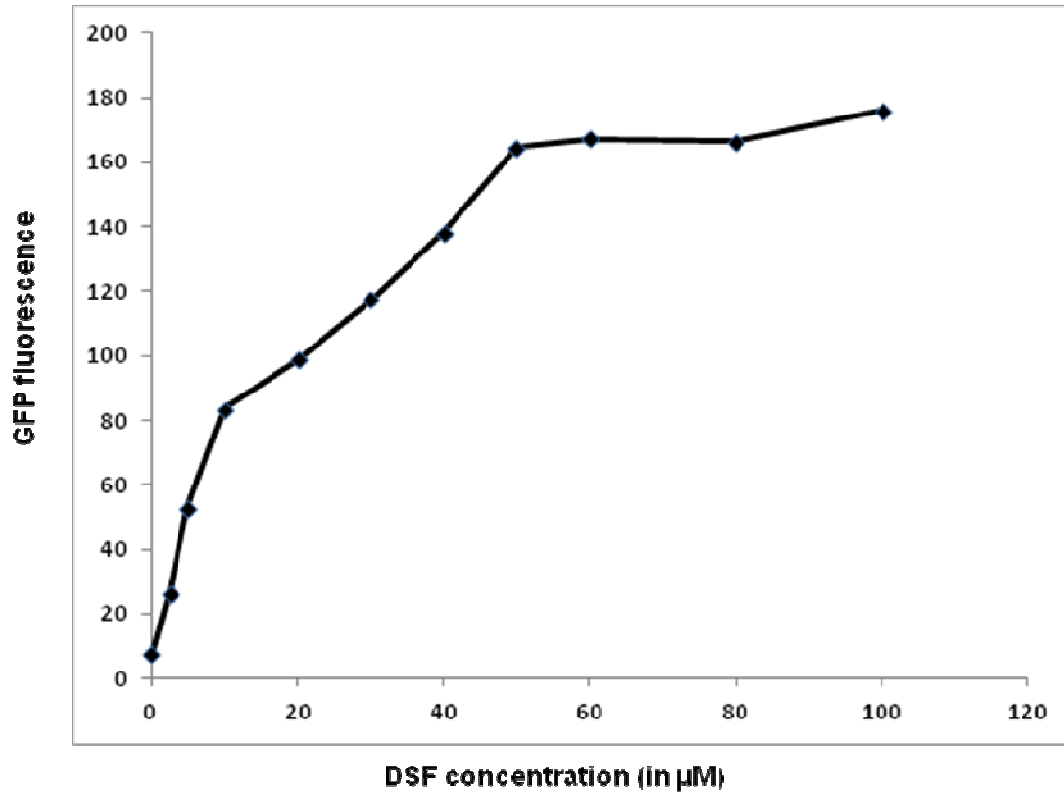

1

2 **Fig. S2.** Response of the *Xcc* DSF biosensor strain to synthetic DSF. *Xcc* 8523 (pKLN55) strain  
3 harbouring a transcriptional fusion of GFP with the endoglucanase (*eng*) promoter (*P eng: gfp*)  
4 was grown in the presence of different concentration of synthetic DSF for 30 h. Y-axis indicates  
5 average whole cell GFP fluorescence determined by fluorescence spectrophotometer (GFP  
6 fluorescence intensity at Excitation.-472 nm, Emission.-512 nm).

7

8

9

10

11

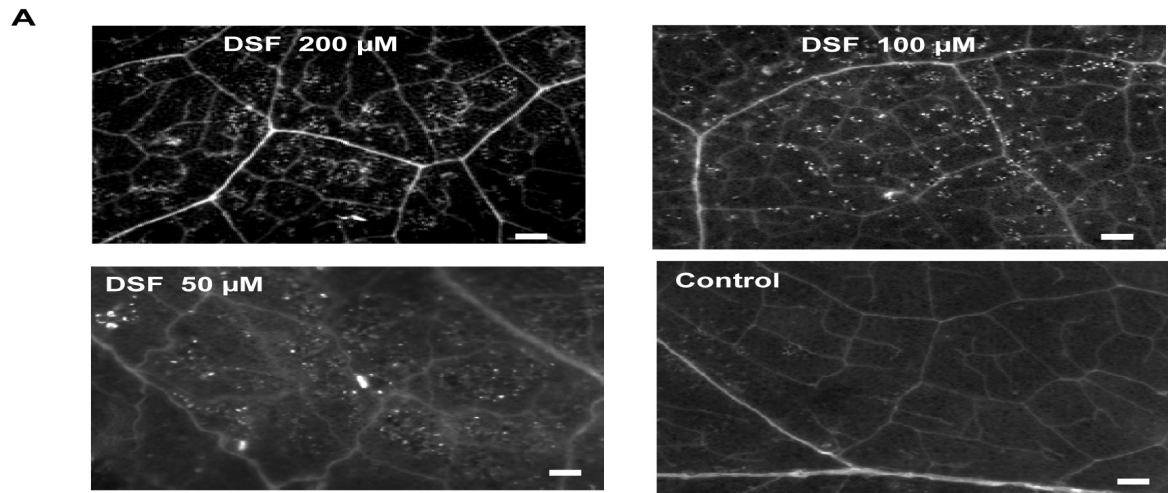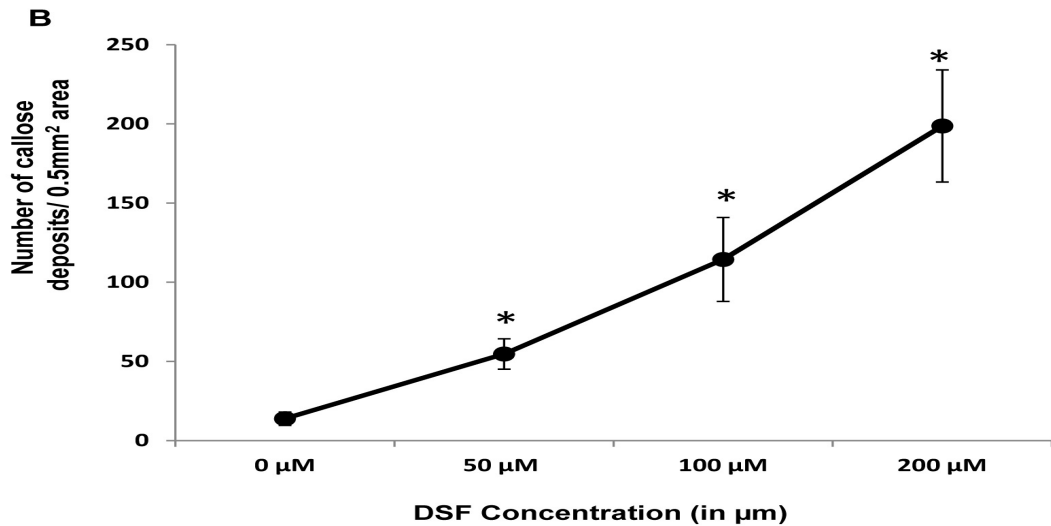

1

2 **Fig. S3.** DSF induced callose deposition in *N. benthamiana* leaves.

3 (A) *N. benthamiana* leaves were infiltrated with (Left to right) 200, 100, 50  $\mu\text{M}$  DSF and control

4 (0  $\mu\text{M}$ ), visualized for callose deposition 18 h post infiltration. Bars = 500  $\mu\text{m}$ . (B) Average

5 numbers of callose deposits per  $0.5\text{mm}^2$ . Error bars represent SD values from four leaves from

6 each plant in three independent experiments. For each leaf, six microscopic fields were analyzed.

7 \* indicate  $P < 0.01$ , significant differences between the responses to the DSF treatment compared

8 to the control (indicated by 0  $\mu\text{M}$ ) as assessed by Student's t test.

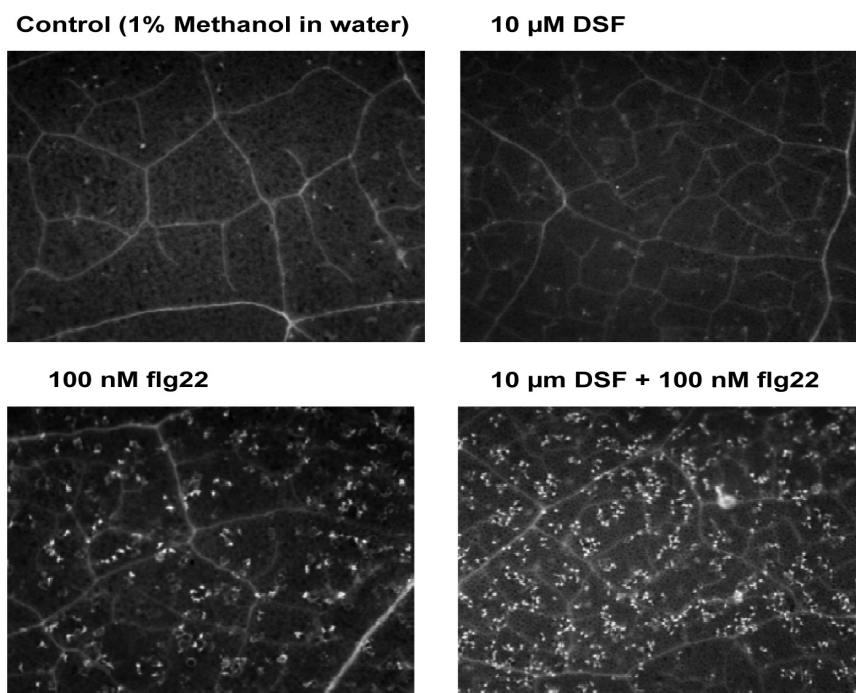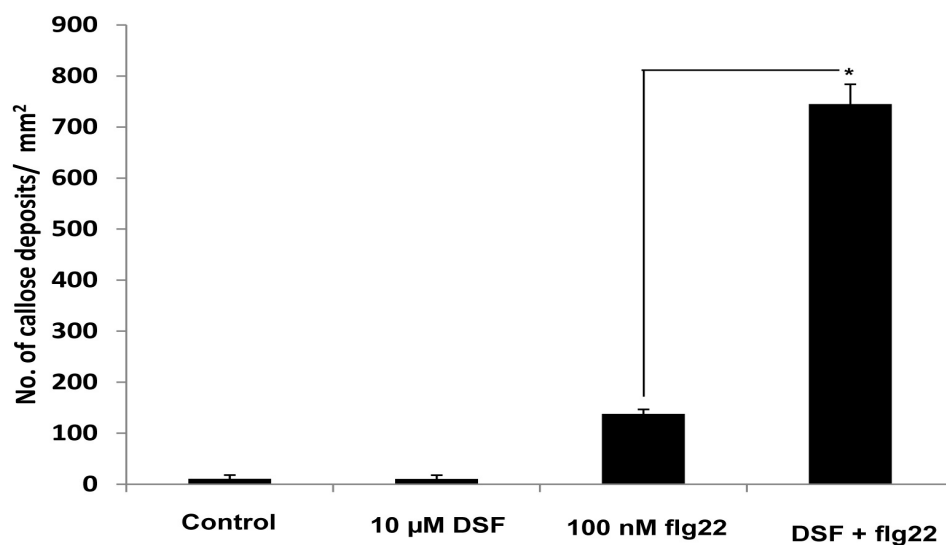

**Fig. S4.** Callose deposition in *N. benthamiana* leaves pretreated with DSF and subsequently challenged with flg22.

(A) *N. benthamiana* leaves were pre-infiltrated with 10 μM DSF or 1% methanol (solvent control) for 16 h prior to challenge with 100 nM flg22 for 18 h and stained with aniline blue to

visualize callose deposition by epifluorescence microscope. Bars = 500  $\mu\text{m}$ . **(B)** Average numbers of callose deposits per  $\text{mm}^2$ . Error bars represent SD values from four leaves from each plant in three independent experiments. For each leaf, six microscopic fields were analyzed. \* indicates  $p < 0.01$  in student's  $t$  test.

1

2

3

4

5

6

7

8



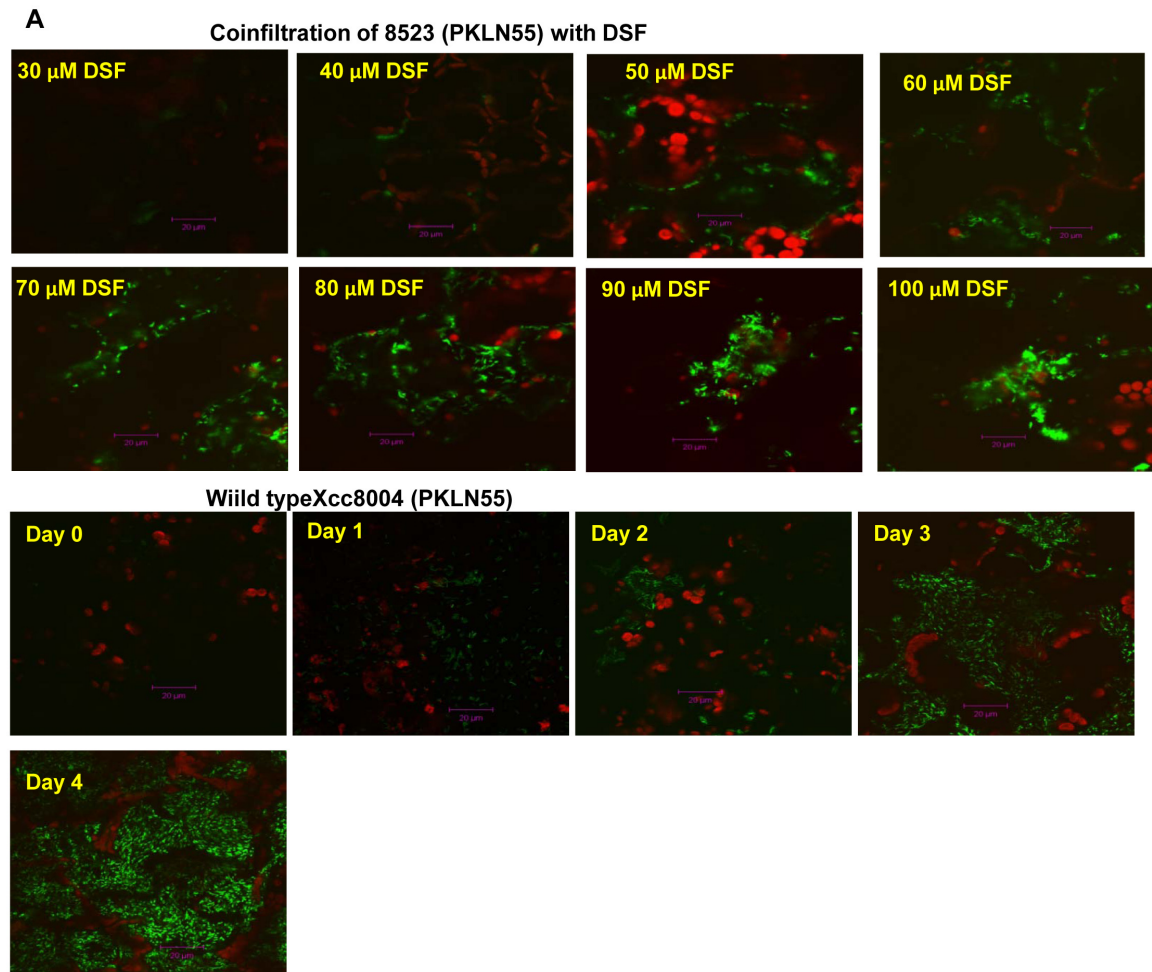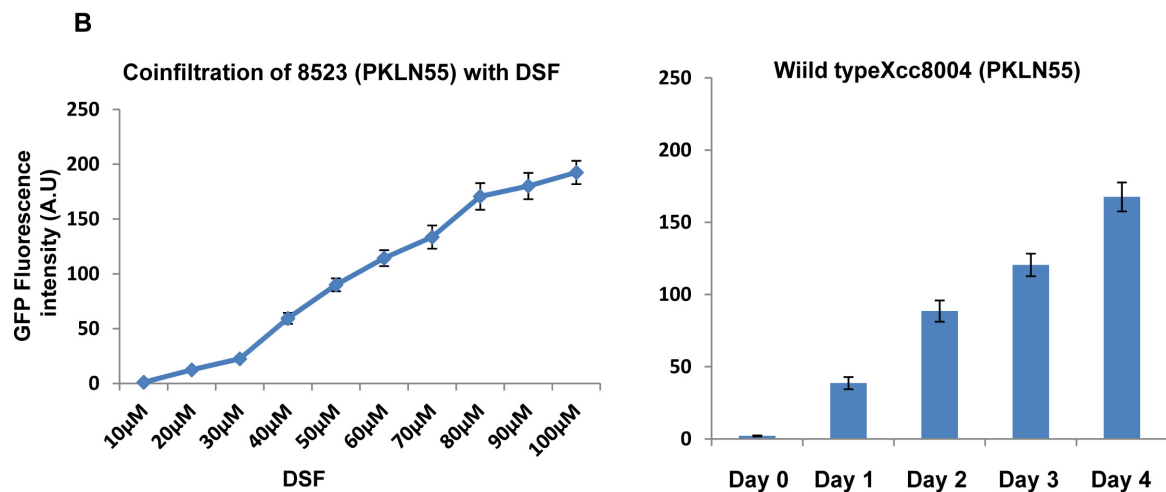

1  
2 **Fig. S5.** Detection of DSF production in *N. benthamiana* leaves using the Xcc DSF biosensor  
3 strains.

1 The wild type Xcc8004 (pKLN55) and 8523 (pKLN55) strains were grown overnight for 12 h to  
2 a density of  $1 \times 10^6$  C.F.U/ml, similar to cultures used in the infiltration experiments. At low cell  
3 density ( $1 \times 10^6$  C.F.U /ml), the Xcc8004 DSF biosensor strain exhibits low GFP fluorescence,  
4 which is indicative of low DSF production in PS media (Pradhan and Chatterjee 2014). For  
5 estimating DSF levels *in planta*, *N. benthamiana* leaves were infiltrated with either wild type  
6 Xcc8004 (pKLN55) or 8523 (pKLN55) coinfiltrated with different concentrations of DSF.  
7 Leaves were analyzed by Confocal Laser Scanning Microscopy (CLSM). (A) Representative  
8 CLSM of leaves infiltrated with 8523 (pKLN55) +DSF or 8004 (pKLN55). Scale bar: 20  $\mu$ m.  
9 Excitation maximum was at 488 nm (argon laser) and emissions were collected at 510 to 530 nm  
10 (for EGFP fluorescence) and 650 to 710 nm (for leaf red auto fluorescence). The panels depict  
11 confocal microscope based projection images (130 by 130 by 32  $\mu$ m<sup>3</sup> in the X, Y and Z axis  
12 beginning from the dorsal surface) of *N. benthamiana* leaves. (B) The mean GFP pixel intensity  
13 of ~50 bacterial cells of 8523 (pKLN55) were measured and compared with the mean GFP  
14 fluorescence intensity of wild type Xcc8004 (pKLN55) after 0, 1, 2, 3 and 4-day post  
15 inoculation. Approximately, 50 cells per field were observed and 10-15 fields were counted per  
16 leaf (six leaf each from three independent experiments were analyzed). Error bars represent  
17 SEM.

18

19

20

21

22

23

24

25

26

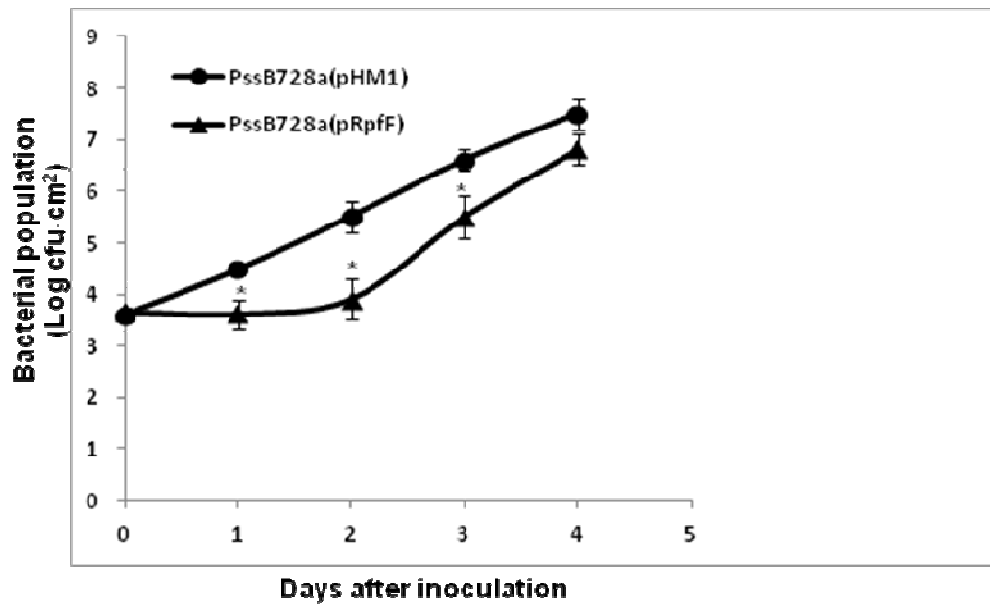

1

2 **Fig. S6.** *In planta* growth of *Pss* harboring the Xcc pRpfF.

3 Leaves of 4-week -old *N. benthamiana* were infiltrated with wild type *Pss* harboring the plasmid  
 4 containing the DSF synthase (pRpfF) or the empty vector (pHM1). Bacterial population was  
 5 measured at 0, 1, 2, 3 and 4 days post inoculation from six 1 cm<sup>2</sup> leaf disc areas around the  
 6 infiltration zone. Values presented are average log (cfu/cm<sup>2</sup>) from six leaves each from two  
 7 independent experiments. \* indicate  $p \leq 0.05$ , significantly different population of bacteria  
 8 compared with the wild type *Pss* harboring the empty vector (pHM1) control based on a pair  
 9 wise Student *t* test.

10

11

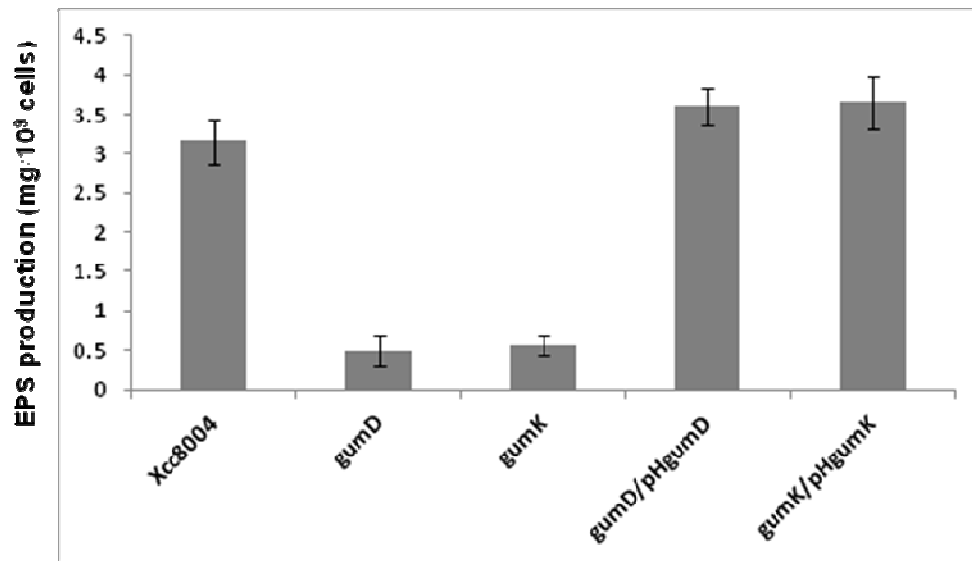

1

2 **Fig. S7.** EPS production assay. Different strains of *Xcc* were grown in PS medium overnight and  
 3 EPS was isolated by acetone precipitation and quantitated by phenol sulphuric acid method.  
 4 *Xcc8004* (wild type), *gumD*, *gumK*, *gumD/pHgumD* (*gumD* mutant harboring the wild type  
 5 *gumD* gene in complementing plasmid) and *gumK/pHgumK* (*gumK* mutant harbouring the wild  
 6 type *gumK* gene in complementing plasmid) strains were used. Error bars represents average  
 7 EPS production from three independent experiments each with three replicates.

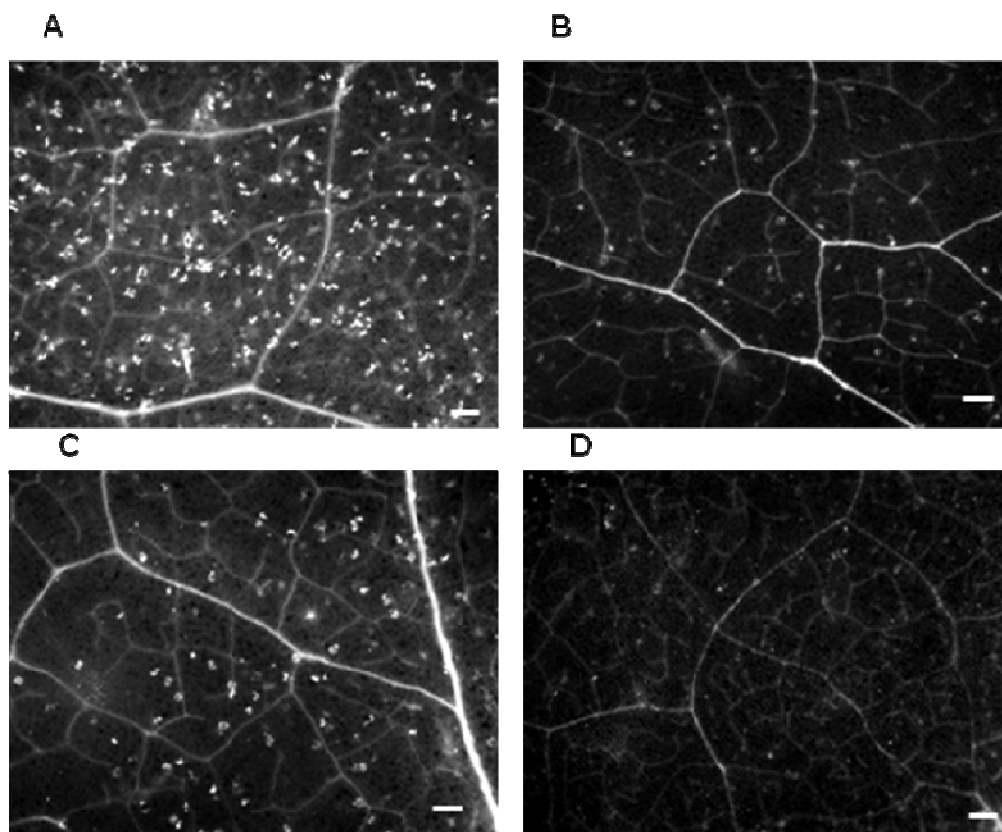

1

2

3 **Fig. S8.** 2-deoxy-D-Glc (2 DDG) inhibits the DSF induced callose deposition in *N. benthamiana*  
4 leaves. *N. benthamiana* leaves were pretreated with either (A) control (1% methanol in water) or  
5 (B) 250  $\mu$ M of 2 DDG and subsequently after 8 h, infiltrated with 1mM DSF. (C) Coinfiltration  
6 of 250  $\mu$ M DDG with 1 mM DSF suppressed DSF induced callose deposits. (D) Water control.  
7 Callose deposition was visualized by staining with aniline blue and visualized by stereo  
8 fluorescence microscope. White dots in these pictures are indicative of callose deposition. Bars  
9 = 500  $\mu$ m.

10

11

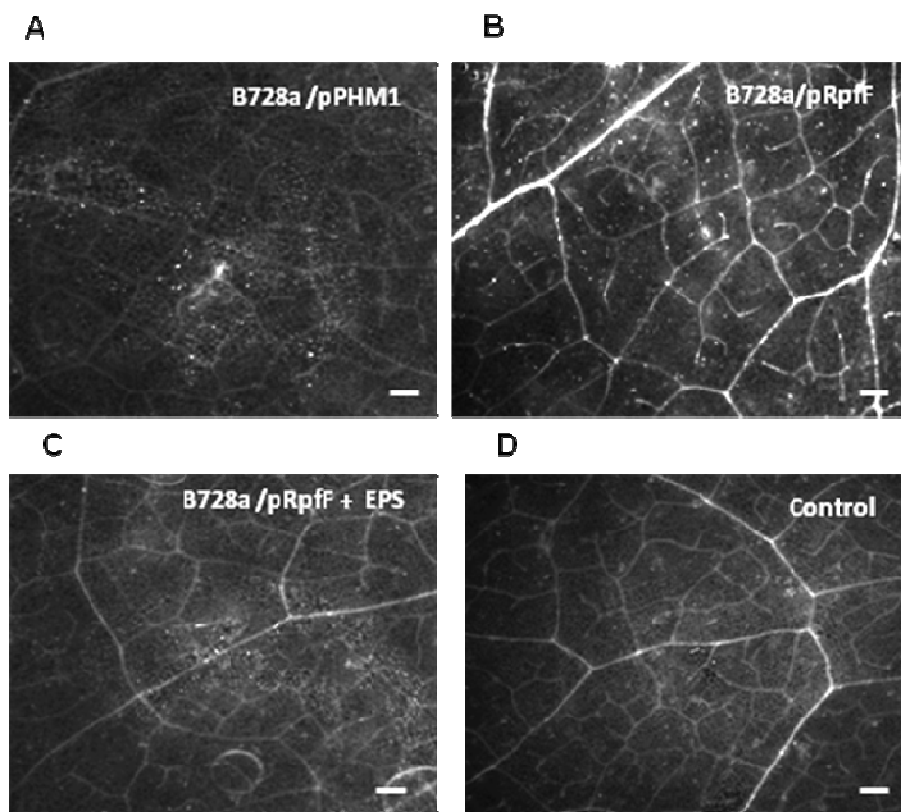

1

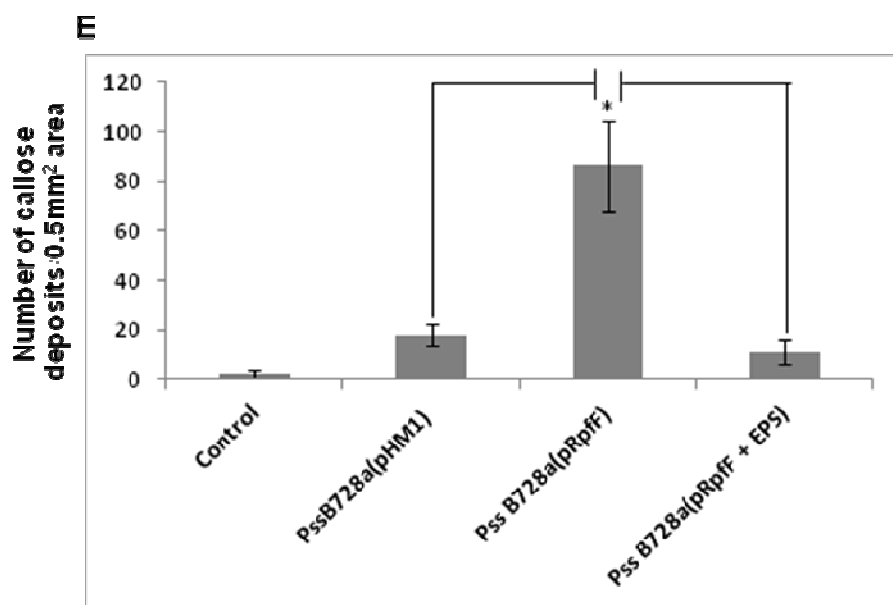

2

3 **Fig. S9.** Callose deposition induced by the *P. syringae* PssB728a wild type strain harboring the  
 4 *Xcc rpjF* is suppressed by *Xcc* xanthan. *N. benthamiana* leaves infiltrated with  $1 \times 10^6$  C.F.U/ ml

1 suspension of different *Pss* strains; (A) B728a (pHM1; empty vector control); (B) B728a  
2 (pRpF); (C) coinfiltration of B728a (pRpF ) with *Xcc* xanthan (0.5 mg/ml); and (D) control  
3 (water). Callose deposition was visualized by staining with aniline blue and visualized by  
4 fluorescence microscope 24 h post inoculation. Bars = 500  $\mu$ m. (E) Average number of callose  
5 deposits per 0.5 mm<sup>2</sup> area. Error bars represent SD values from four leaves of each plant in three  
6 independent experiments. Six microscopic fields from each leaf were analyzed. \* Indicates (p<  
7 0.001) significantly different callose deposits induced by the *Pss*B728a (pRpF) compared with  
8 either the B728a (pHM1) strain or coinfiltration of *Pss*B728a (pRpF) strain with *Xcc* xanthan as  
9 determined by two tail Student‘t’ test.

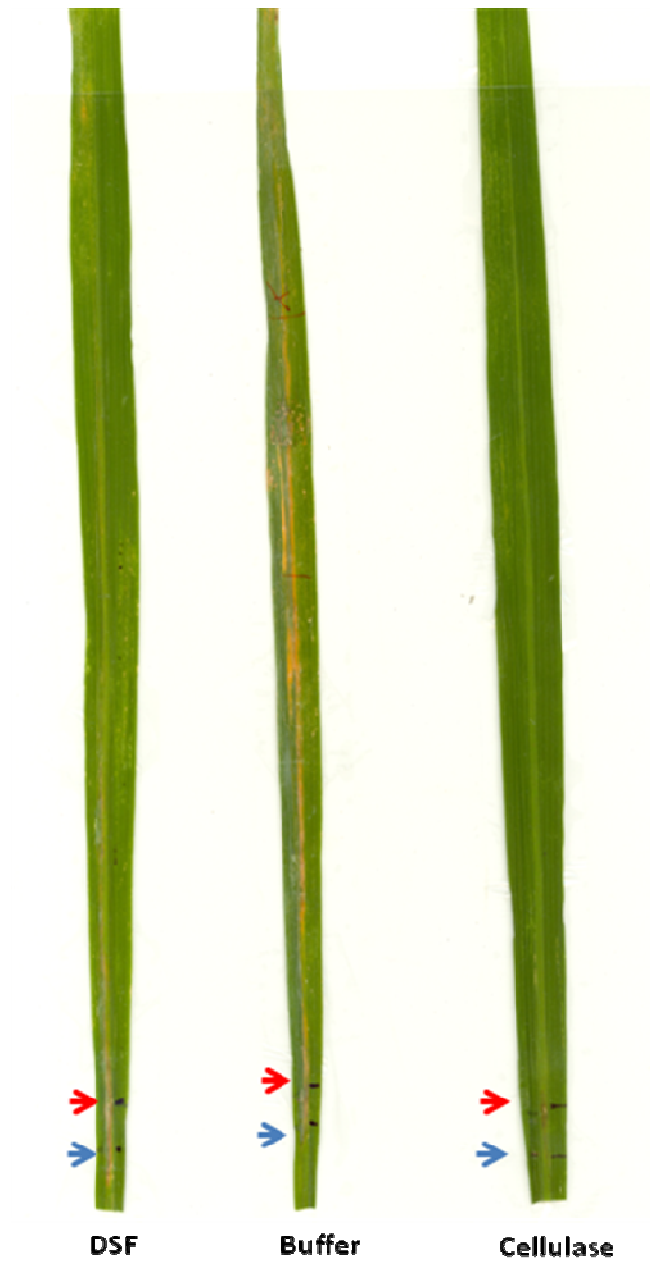

**Fig. S10.** Pretreatment of rice leaves with DSF induces resistance against subsequent *Xanthomonas oryzae* pv. *oryzae* (*Xoo*) infection. The midveins of rice leaves were preinjected with buffer (10mM  $\text{KH}_2\text{PO}_4$ ), DSF (100  $\mu\text{M}$ ) and cellulase (0.1 mg/ml) from *Aspergillus niger*. After 24 h, the *Xoo* wild type strain was inoculated 1 to 2 cm above the point of pretreatment. Disease lesion (discoloration of midveinal regions formed in the leaves were scored 12 days post inoculation of *Xoo*. Disease lesion (discoloration of midveinal regions) formed on leaves



pretreated with buffer, but were either absent or very much reduced in leaves pretreated with DSF or cellulase. Blue arrows indicate the point of pretreatment whereas red arrows indicate the point of subsequent inoculation with wild type *Xoo* strain.

1
